# Supplementary material for: Minimal Inhibitory Concentration (MIC)-Phenomena in Candida albicans and Their Impact on the Diagnosis of Antifungal Resistance
Source: MDPI journal article supplement (doi:10.3390/jof5030083), 2019-09-04
Supplement: s1 [file s1]

## SUPPLEMENTS

**Table S1. Overview on the clinical isolates of *C. albicans* showing MIC-phenomena determined by EUCAST assay.**

| Strain ID | Species            | Antifungal drug | MIC 24 h<br>µg/mL | MIC phenomena (µg/mL)                      |
|-----------|--------------------|-----------------|-------------------|--------------------------------------------|
| SCH 24    | <i>C. albicans</i> | VOR             | 0.06              | trailing <sup>a</sup> > 8                  |
|           |                    | FLU             | 0.5               | trailing <sup>a</sup> > 32                 |
|           |                    | POS             | 0.03              | trailing <sup>a</sup> > 8                  |
|           |                    | ITR             | 0.125             | trailing <sup>a</sup> > 16                 |
|           |                    | CAS             | 0.12              |                                            |
|           |                    | ANI             | 0.03              |                                            |
|           |                    | AMB             | 0.25              |                                            |
| SCH 36    | <i>C. albicans</i> | VOR             | 0.01              | trailing <sup>a</sup> > 8                  |
|           |                    | FLU             | 1                 | trailing <sup>a</sup> > 32                 |
|           |                    | POS             | 0.01              | trailing <sup>a</sup> > 8                  |
|           |                    | ITR             | 0.125             | trailing <sup>a</sup> > 16                 |
|           |                    | CAS             | 0.06              | paradoxical growth <sup>b</sup> at 4 and 8 |
|           |                    | ANI             | 0.03              |                                            |
|           |                    | AMB             | 0.25              |                                            |
| SCH 40    | <i>C. albicans</i> | VOR             | 0.01              | trailing <sup>a</sup> > 8                  |
|           |                    | FLU             | 1                 | trailing <sup>a</sup> > 32                 |
|           |                    | POS             | 0.01              | trailing <sup>a</sup> > 8                  |
|           |                    | ITR             | 0.125             | trailing <sup>a</sup> > 16                 |
|           |                    | CAS             | 0.03              | paradoxical growth <sup>b</sup> at 4 and 8 |
|           |                    | ANI             | 0.03              | paradoxical growth <sup>b</sup> at 4       |
|           |                    | AMB             | 0.25              |                                            |
| SCH12     |                    | VOR             | 0.06              |                                            |
|           |                    | POS             | 0.03              | trailing <sup>a</sup> > 8                  |
|           |                    | CAS             | 0.12              |                                            |
|           |                    | ANI             | 0.03              |                                            |
| SCH16     |                    | VOR             | 0.01              |                                            |
|           |                    | POS             | 0.01              |                                            |
|           |                    | CAS             | 0.06              | paradoxical growth <sup>b</sup> at 4 and 8 |
|           |                    | ANI             | 0.03              |                                            |
| SCH14     |                    | VOR             | 0.01              | trailing <sup>a</sup> > 8                  |
|           |                    | POS             | 0.01              |                                            |
|           |                    | CAS             | 0.03              | paradoxical growth <sup>b</sup> at 4 and 8 |
|           |                    | ANI             | 0.03              |                                            |
| SCH22     |                    | VOR             | 0.06              |                                            |
|           |                    | POS             | 0.03              | trailing <sup>a</sup> > 8                  |
|           |                    | CAS             | 0.12              |                                            |

|       |     |      |                                      |
|-------|-----|------|--------------------------------------|
| SCH26 | ANI | 0.03 | paradoxical growth <sup>b</sup> at 4 |
|       | VOR | 0.01 |                                      |
|       | POS | 0.01 |                                      |
|       | CAS | 0.06 |                                      |
|       | ANI | 0.03 |                                      |

VOR, voriconazole; FLU, fluconazole; ITR, itraconazole; POS, posaconazole; CAS, caspofungin; ANI, anidulafungin; MICA, micafungin; AMB amphotericin B; <sup>a</sup>Trailing is defined as a reduced turbidity compared to the positive growth control, fully inhibited growth is not reacted and therefore well fails to become optically clear for MIC reading (as suggested by the guideline).; <sup>b</sup>Paradoxical phenomenon (PXE) was defined as reoccurring growth at higher concentrations than the determined MIC.

Figure S1

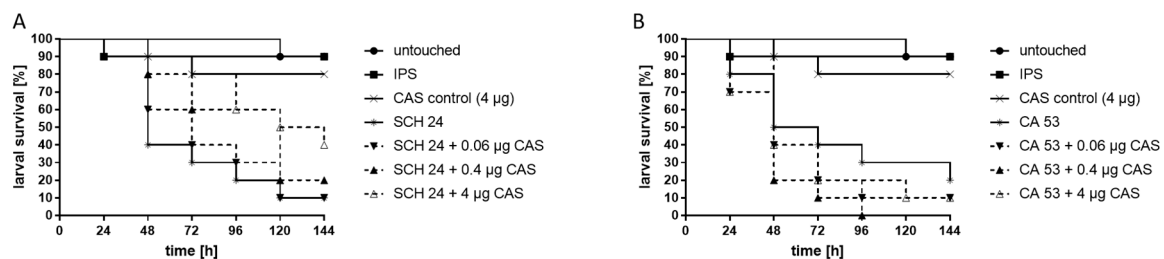

**Figure S1.** *In vivo* efficacy of caspofungin (CAS) in larvae infected with CAS susceptible (A) and CAS resistant (B) strains (no MIC phenomenon). Caspofungin treatment significantly increased ( $p \leq 0.05$ ) survival of *G. mellonella* larvae infected with *C. albicans* SCH 24 (= susceptible strain) and exhibited no curative effect on larvae infected with CR 53 (= resistant strain). Larvae were infected with each  $10^6$  cells and received antifungal treatment 2h post infection. Insect physiological saline (IPS) was used as an injection control and larvae receiving no treatment served as control.

Figure S2

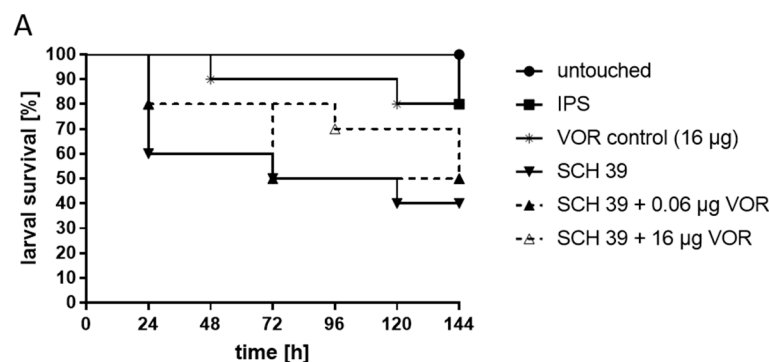

**Figure S2.** Voriconazole (VOR) treatment increased survival of *G. mellonella* larvae although lacking statistical significance ( $p = 0.48$ ) infected with *Candida albicans* strain SCH 39 (VOR MIC 0.0078 µg/mL). Larvae were infected with each  $10^6$  cells and received antifungal treatment 2h post infection. Insect physiological saline (IPS) was used as an injection control and larvae receiving no treatment served as control.
